# Supplementary material
Source: publisher figshare collection journal article supplement (https://acs.figshare.com/ndownloader/files/10170168)
Supplement: Supplementary file 1 [file 10170168]

# Supporting Information

## Catalytic Enantioselective Synthesis of Key Propargylic Alcohol Intermediates of the Anti-HIV Drug Efavirenz

Yu Zheng, Lili Zhang, and Eric Meggers\*

Fachbereich Chemie, Philipps-Universität Marburg, Hans-Meerwein-Strasse 4, 35043 Marburg,  
Germany

\*Corresponding author: meggers@chemie.uni-marburg.de

### Table of Contents:

|                                                                          |     |
|--------------------------------------------------------------------------|-----|
| 1. Enantioselectivities as Determined by HPLC on Chiral Stationary Phase | S2  |
| 2. Product Purities as Determined by HPLC Analysis                       | S8  |
| 3. NMR Spectra                                                           | S10 |

## 1. Enantioselectivities as Determined by HPLC on Chiral Stationary Phase

The enantiomeric excess of the compounds **2b** and **2c** from catalytic reactions were determined on a Daicel Chiralpak AD-H, or OD-H (250×4.6 mm) HPLC column on an Agilent 1200 Series HPLC System using hexane/isopropanol as a mobile phase. The column temperature was 25 °C and UV-absorption was measured at 220 nm.

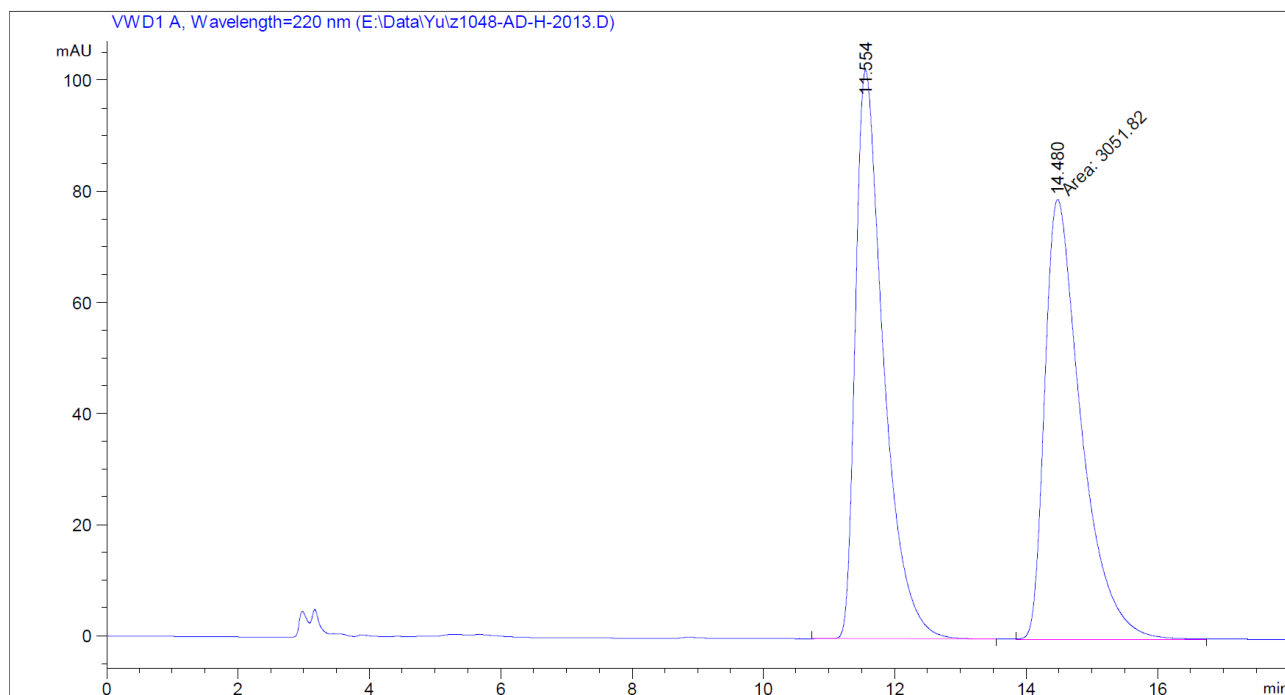

| Peak # | RetTime [min] | Type | Width [min] | Area [mAU*s] | Height [mAU] | Area %  |
|--------|---------------|------|-------------|--------------|--------------|---------|
| 1      | 11.554        | BB   | 0.4432      | 3046.60596   | 102.37451    | 49.9572 |
| 2      | 14.480        | MM   | 0.6424      | 3051.82495   | 79.18198     | 50.0428 |

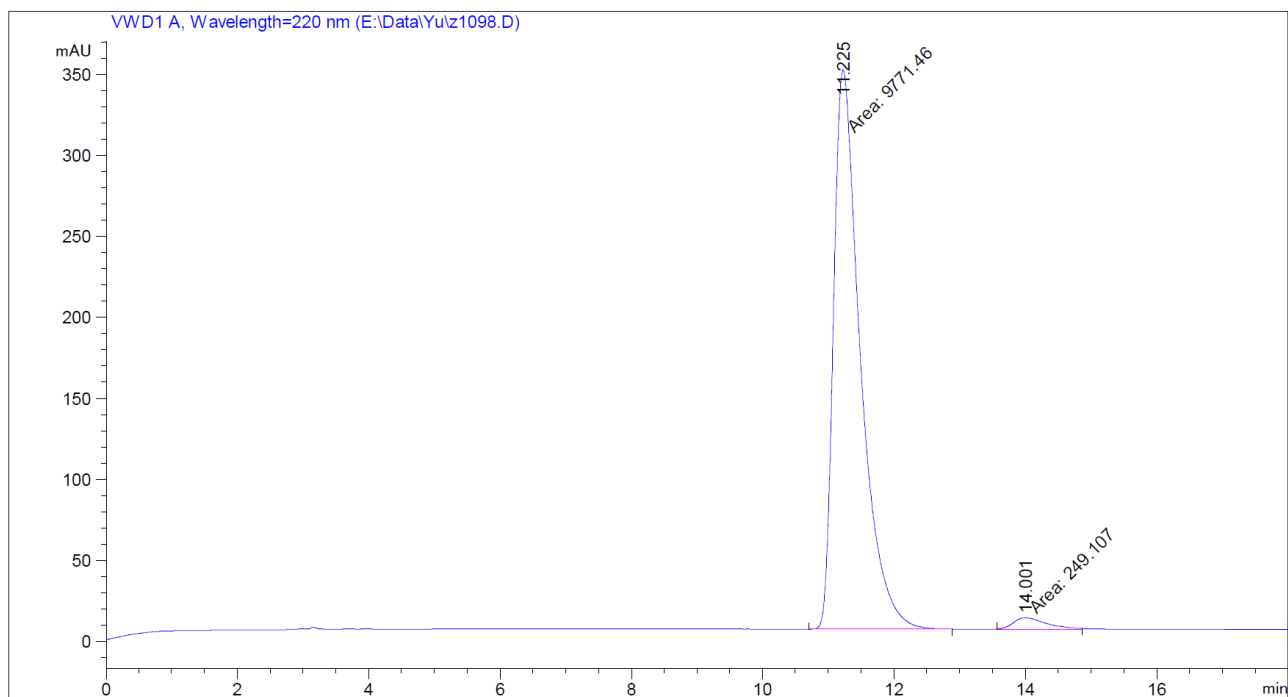

| Peak # | RetTime [min] | Type | Width [min] | Area [mAU*s] | Height [mAU] | Area %  |
|--------|---------------|------|-------------|--------------|--------------|---------|
| 1      | 11.225        | MM   | 0.4713      | 9771.46191   | 345.55936    | 97.5140 |
| 2      | 14.001        | MM   | 0.5840      | 249.10698    | 7.10932      | 2.4860  |

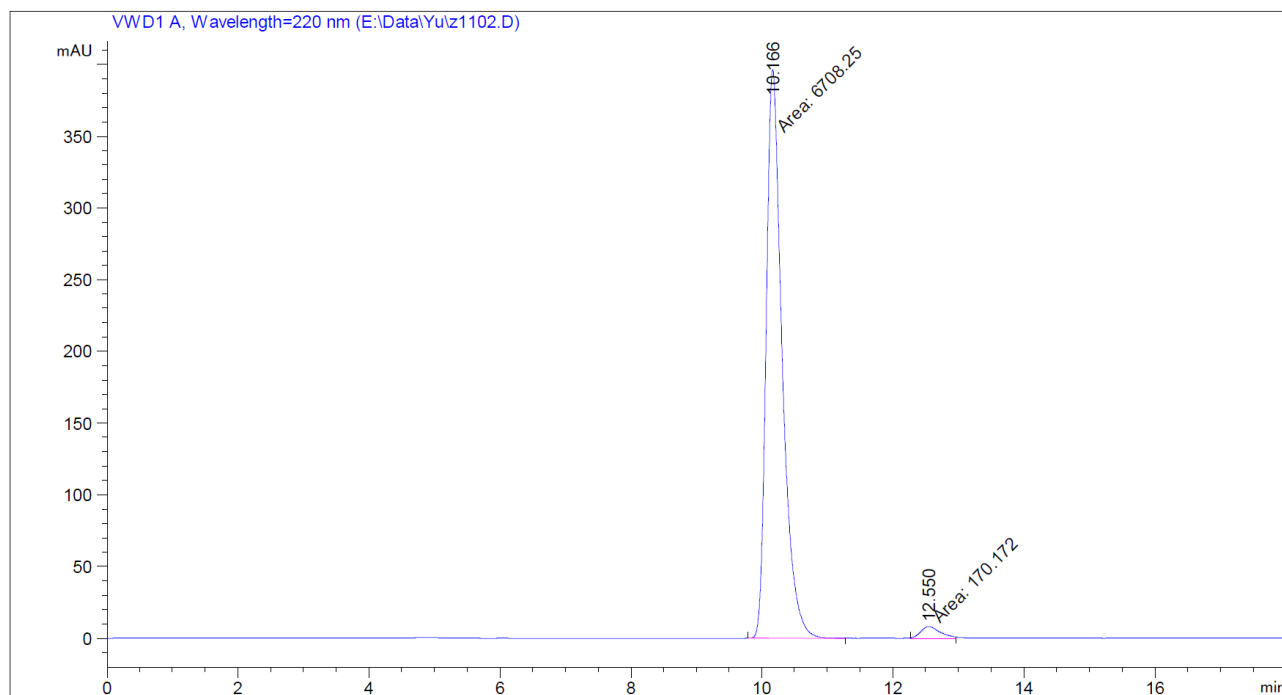

| Peak # | RetTime [min] | Type | Width [min] | Area [mAU*s] | Height [mAU] | Area %  |
|--------|---------------|------|-------------|--------------|--------------|---------|
| 1      | 10.166        | MM   | 0.2822      | 6708.25244   | 396.23730    | 97.5260 |
| 2      | 12.550        | MM   | 0.3446      | 170.17244    | 8.23030      | 2.4740  |

**Figure S1.** HPLC traces (Daicel Chiralpak AD-H column) of *rac*-**2b** (reference), (*S*)-**2b** (from catalytic reaction) and (*S*)-**2b** (from gram-scale reaction).

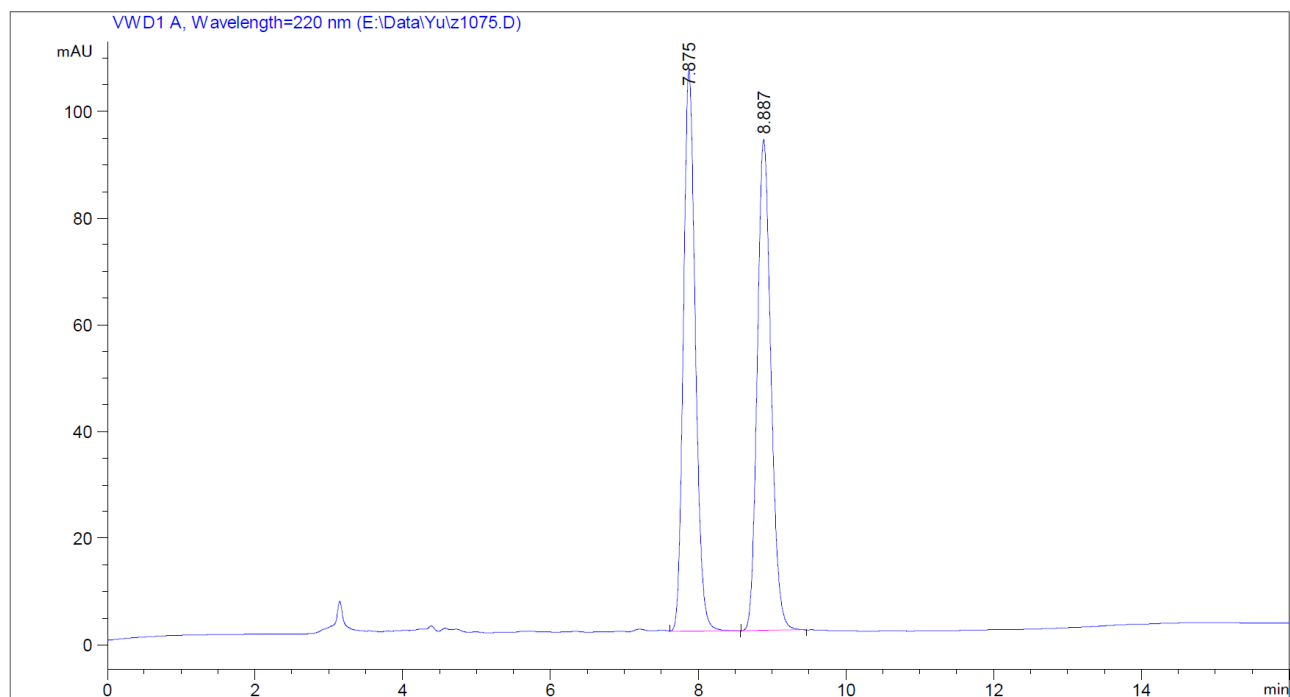

| Peak # | RetTime [min] | Type | Width [min] | Area [mAU*s] | Height [mAU] | Area %  |
|--------|---------------|------|-------------|--------------|--------------|---------|
| 1      | 7.875         | BB   | 0.1731      | 1180.99463   | 105.07318    | 49.9676 |
| 2      | 8.887         | BB   | 0.1989      | 1182.52405   | 92.03837     | 50.0324 |

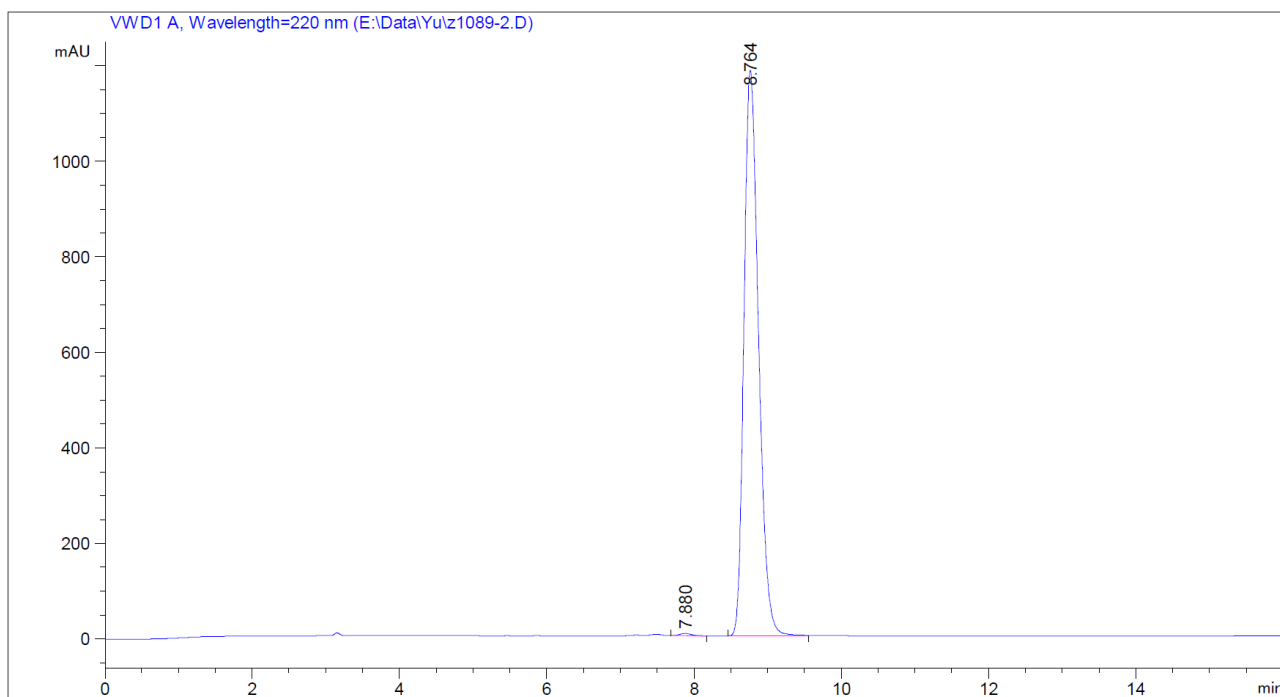

| Peak # | RetTime [min] | Type | Width [min] | Area [mAU*s] | Height [mAU] | Area %  |
|--------|---------------|------|-------------|--------------|--------------|---------|
| 1      | 7.880         | MM R | 0.1885      | 54.65084     | 4.83102      | 0.3345  |
| 2      | 8.764         | MM R | 0.2151      | 1.62838e4    | 1184.01367   | 99.6655 |

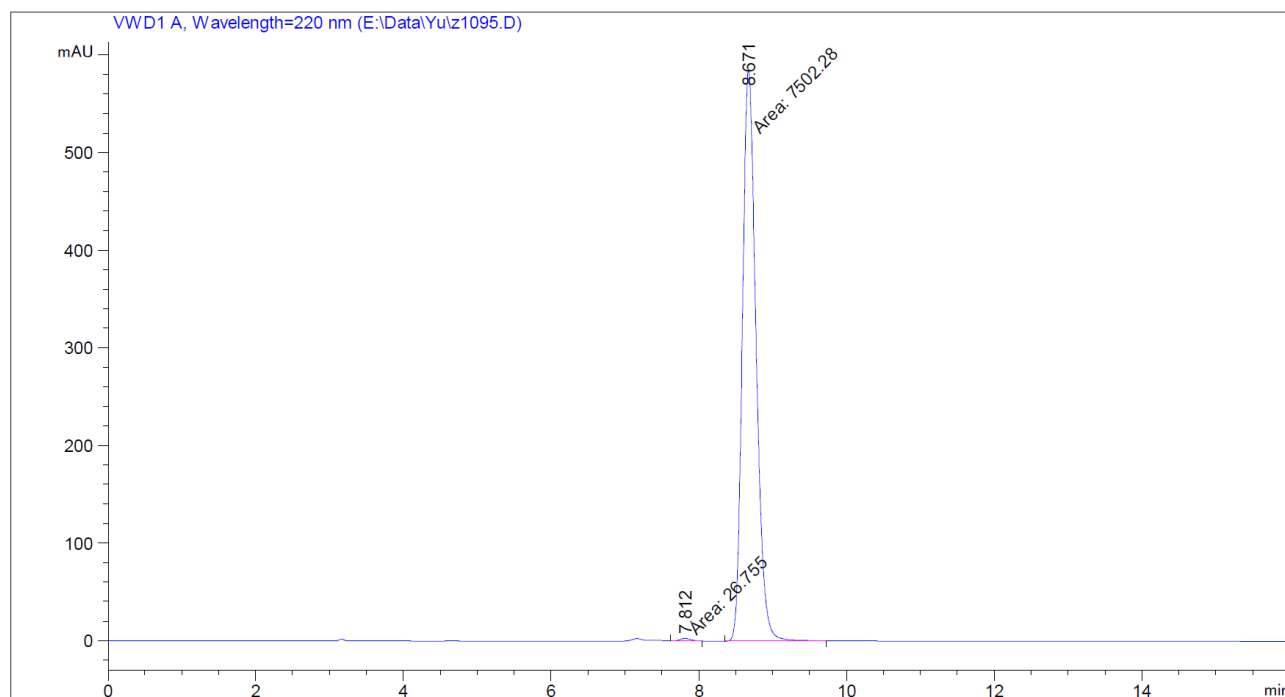

| Peak # | RetTime [min] | Type | Width [min] | Area [mAU*s] | Height [mAU] | Area %  |
|--------|---------------|------|-------------|--------------|--------------|---------|
| 1      | 7.812         | MM   | 0.1784      | 26.75496     | 2.49910      | 0.3554  |
| 2      | 8.671         | MM   | 0.2140      | 7502.27881   | 584.16650    | 99.6446 |

**Figure S2.** HPLC traces (Daicel Chiralpak OD-H column) of *rac*-**2c** (reference), (*S*)-**2c** (from catalytic reaction) and (*S*)-**2c** (from gram-scale reaction).

## 2. Product Purities as Determined by HPLC Analysis

The degree of purities of the compounds **2b** and **2c** were determined by a Purospher® STAR Si column (4.6×250 mm, 5 µm, Merck) with an Agilent 1200 HPLC system using hexane/isopropanol as a mobile phase. The column temperature was 25 °C and UV-absorption was measured at 220 nm.

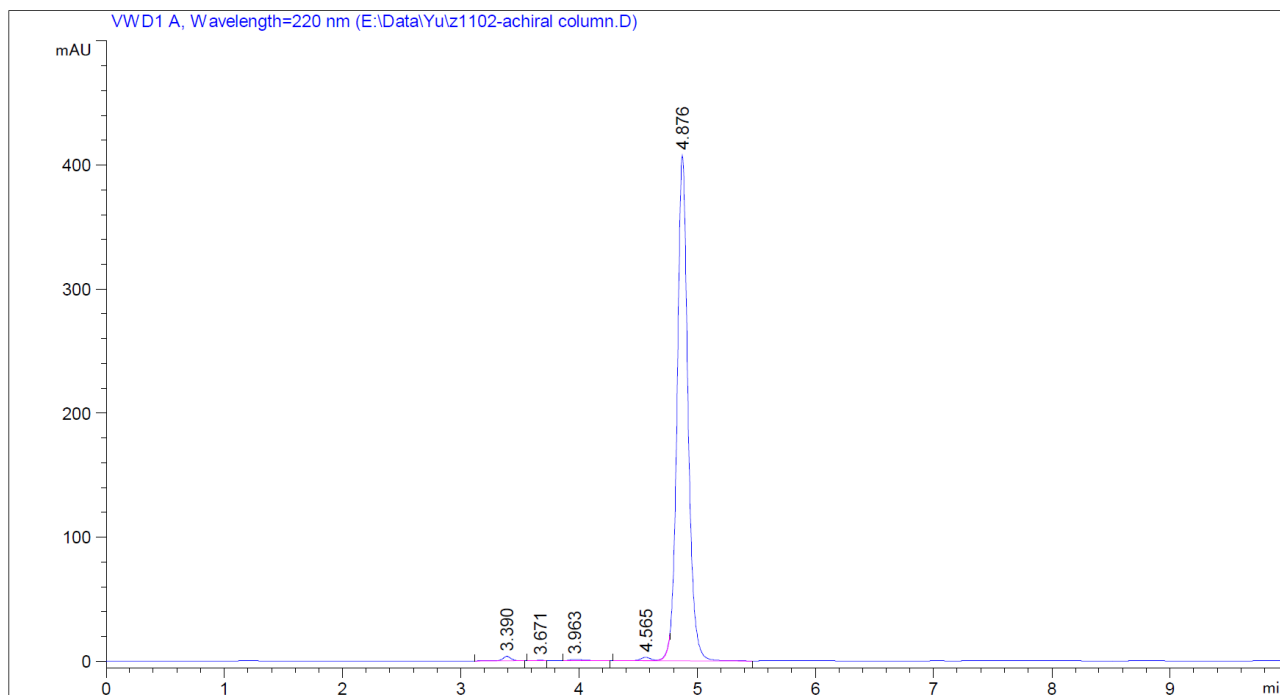

| Peak # | RetTime [min] | Type | Width [min] | Area [mAU*s] | Height [mAU] | Area %  |
|--------|---------------|------|-------------|--------------|--------------|---------|
| 1      | 3.390         | BB   | 0.0726      | 17.18505     | 3.54130      | 0.6416  |
| 2      | 3.671         | BB   | 0.0717      | 6.78882e-1   | 1.47467e-1   | 0.0253  |
| 3      | 3.963         | BB   | 0.1246      | 8.48316      | 9.74286e-1   | 0.3167  |
| 4      | 4.565         | BV E | 0.1076      | 21.15614     | 2.84873      | 0.7899  |
| 5      | 4.876         | VB R | 0.0972      | 2630.93726   | 408.03421    | 98.2265 |

**Figure S3.** HPLC trace of (*S*)-**2b** from gram-scale reaction.



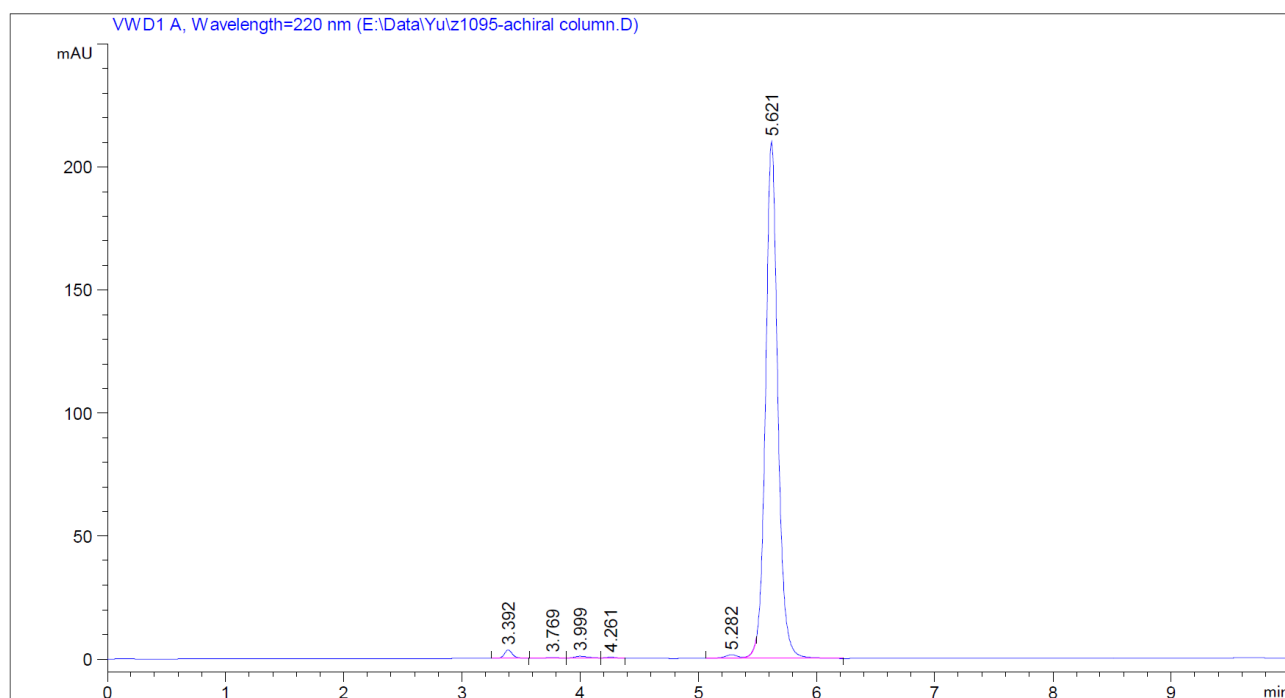

| Peak # | RetTime [min] | Type | Width [min] | Area [mAU*s] | Height [mAU] | Area %  |
|--------|---------------|------|-------------|--------------|--------------|---------|
| 1      | 3.392         | BB   | 0.0696      | 15.75715     | 3.43263      | 1.0119  |
| 2      | 3.769         | BV   | 0.1273      | 1.69205      | 1.96817e-1   | 0.1087  |
| 3      | 3.999         | VV   | 0.1275      | 7.12608      | 8.11219e-1   | 0.4576  |
| 4      | 4.261         | VB   | 0.0906      | 2.75583      | 4.62217e-1   | 0.1770  |
| 5      | 5.282         | BV E | 0.1150      | 10.98457     | 1.42391      | 0.7054  |
| 6      | 5.621         | VB R | 0.1094      | 1518.85229   | 210.00136    | 97.5394 |

**Figure S4.** HPLC trace of (*S*)-**2c** from gram-scale reaction.

## 4. NMR Spectra

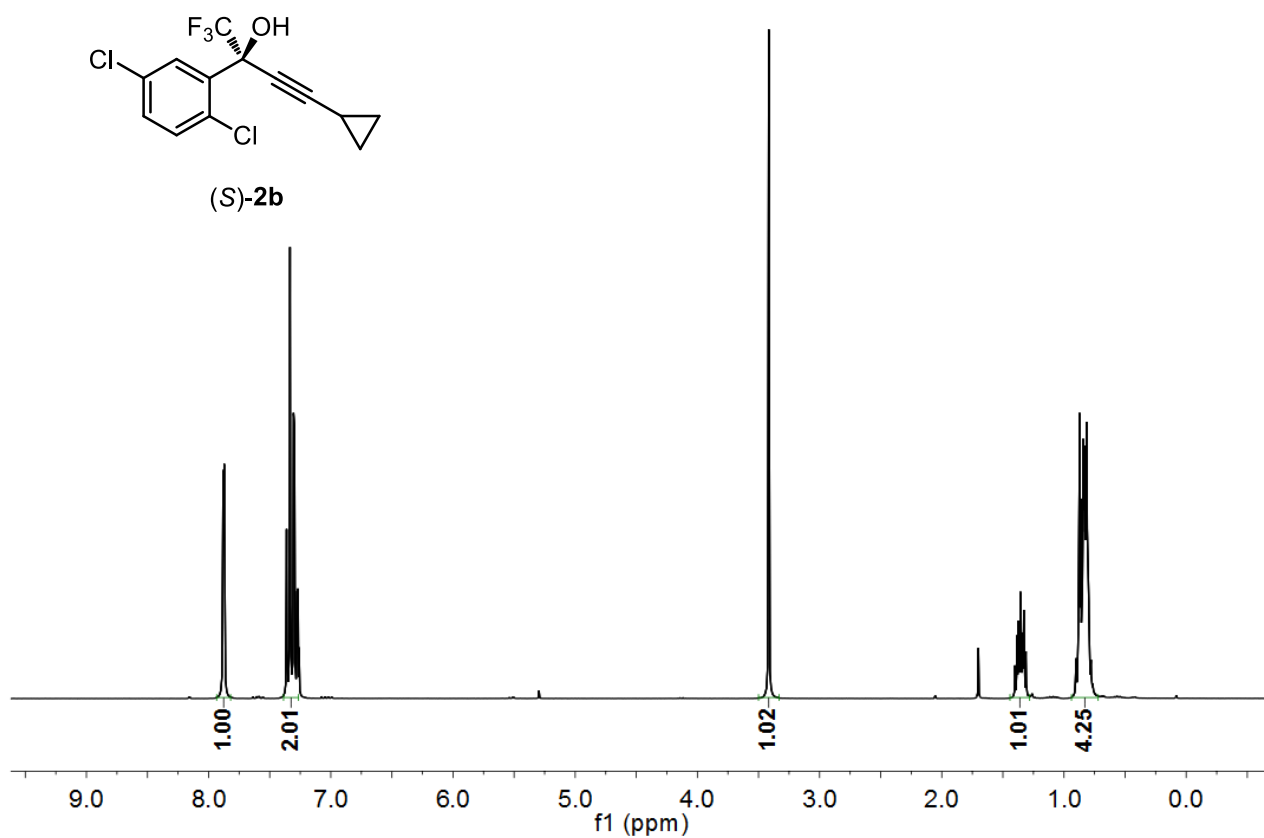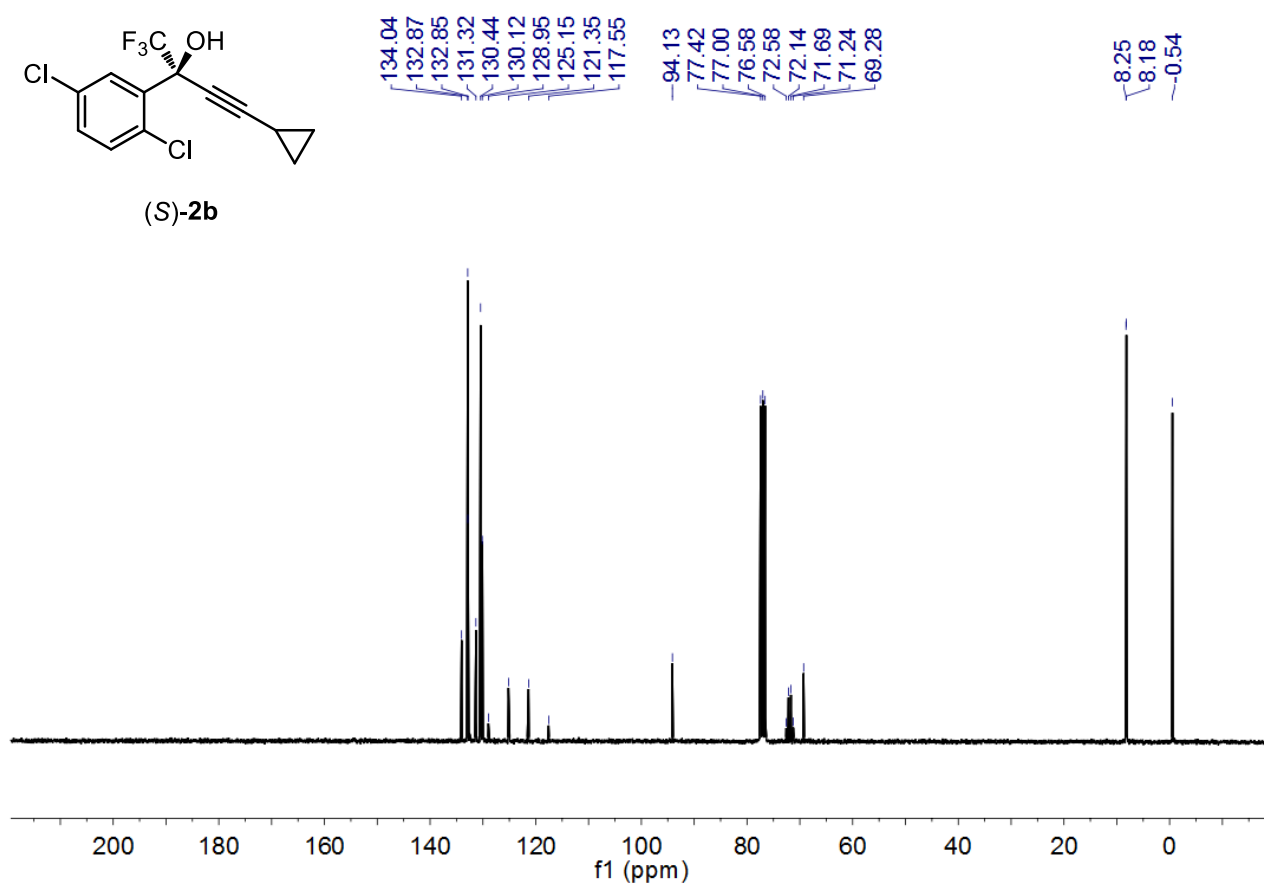

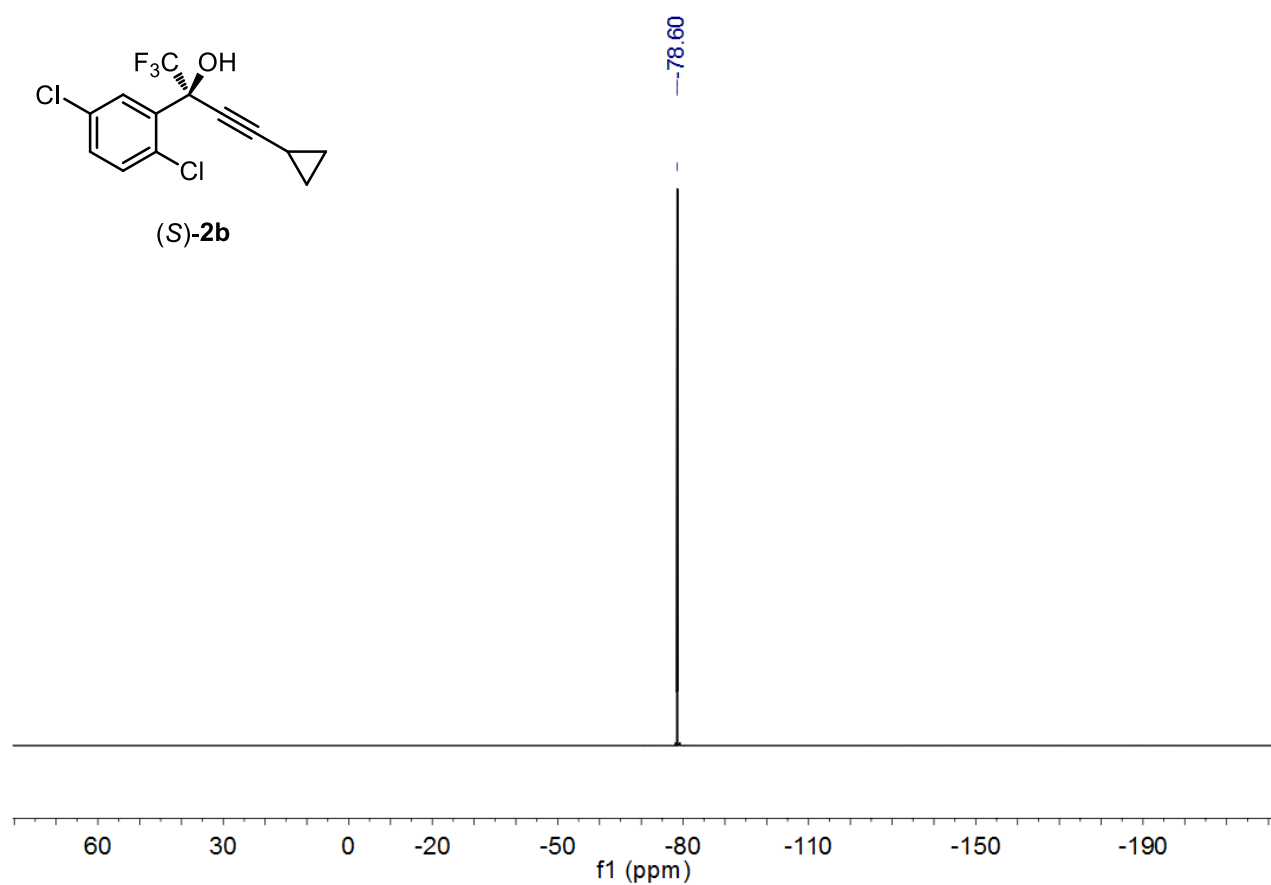

**Figure S5.**  $^1\text{H}$  NMR,  $^{13}\text{C}$  NMR and  $^{19}\text{F}$  NMR spectra of **2b** ( $\text{CDCl}_3$ ).

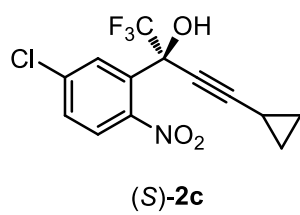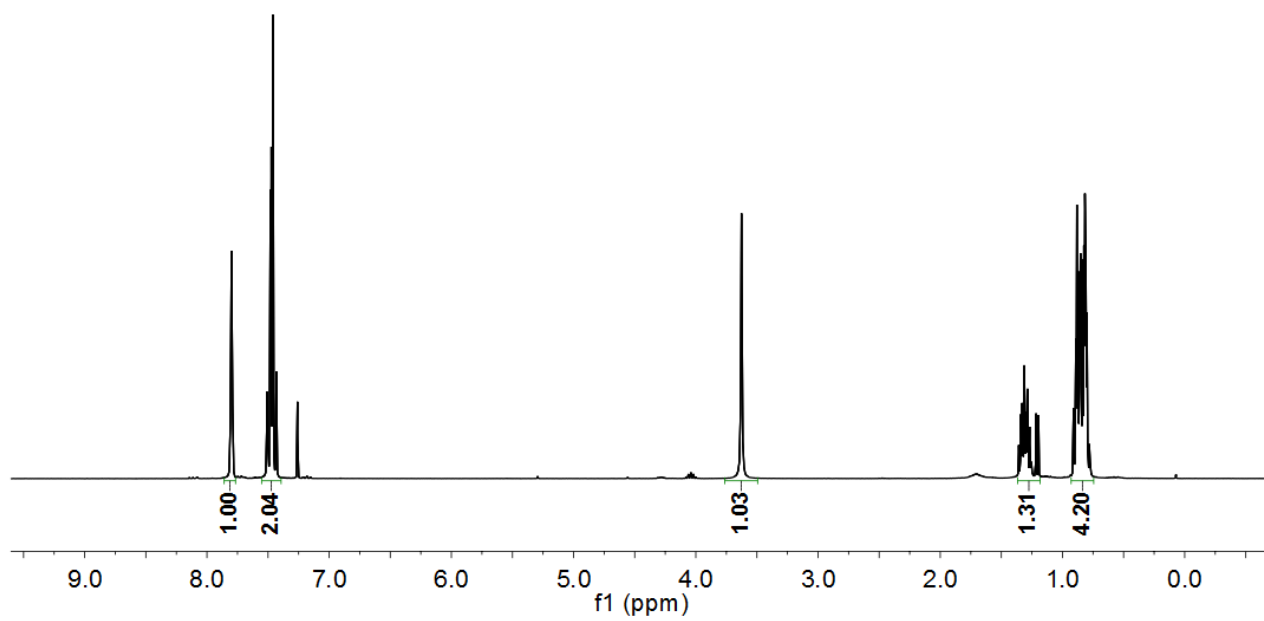

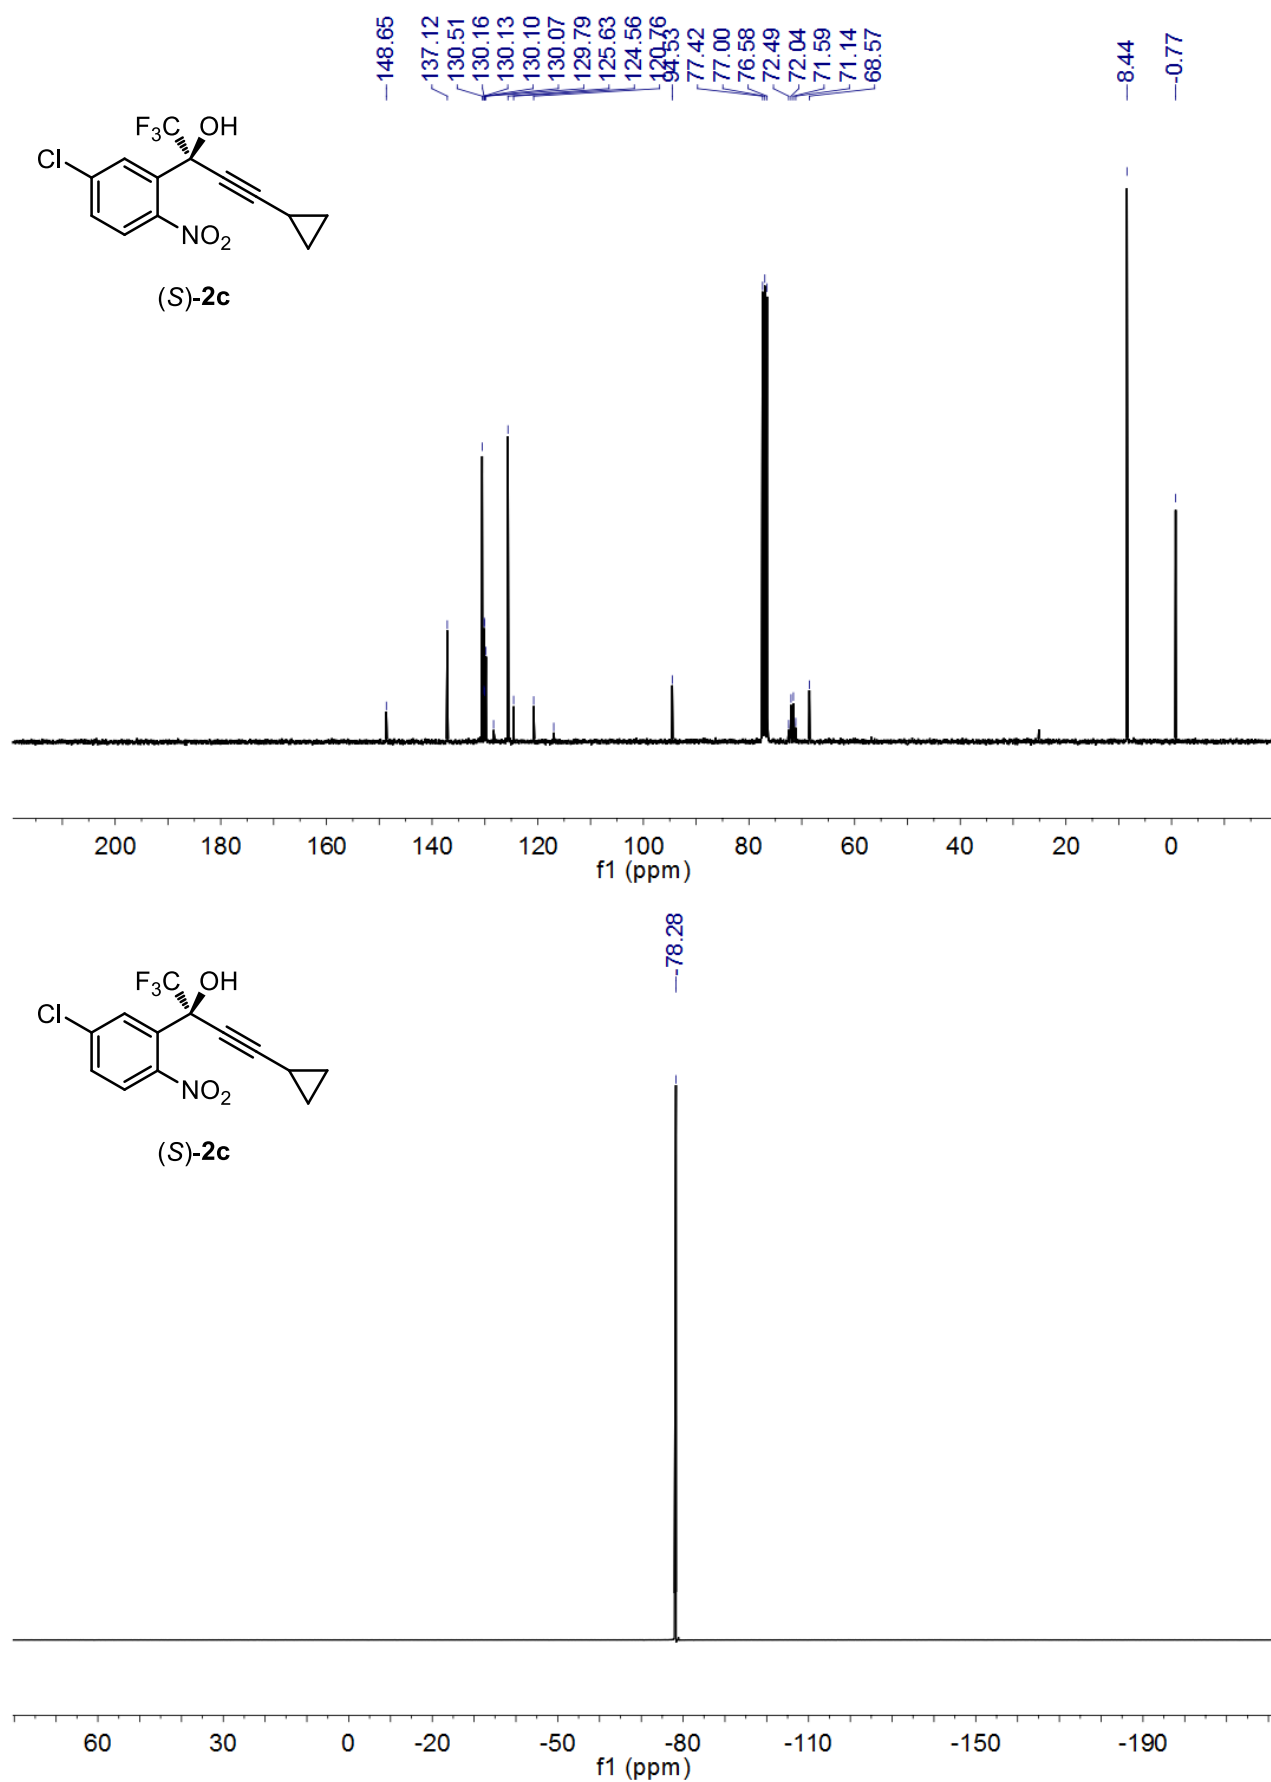

**Figure S6.** <sup>1</sup>H NMR, <sup>13</sup>C NMR and <sup>19</sup>F NMR spectra of **2c** (CDCl<sub>3</sub>).
